# Supplementary material for: Graphitic carbon nitride (g-C3N4) as a metal-free catalyst for thermal decomposition of ammonium perchlorate
Source: Royal Society of Chemistry journal article supplement (doi:10.1039/c5ra01157d), 2015-01-01
Supplement: c5ra01157d1.pdf [file c5ra01157d1.pdf]

## Supporting information

Graphitic carbon nitride (g-C<sub>3</sub>N<sub>4</sub>) as a metal-free catalyst for thermal decomposition of ammonium perchlorate

Qi Li,<sup>1</sup> Yi He,<sup>2,\*</sup> Rufang Peng,<sup>1,\*</sup>

*<sup>1</sup>(State Key Laboratory Cultivation Base for Non-metal Composites and Functional Materials, Southwest University of Science and Technology, Mianyang 621010, P, R, China)*

*<sup>2</sup>(College of Defence Technology, southwest University of Science and Technology, Mianyang, 621010, P, R, China)*

---

\* Corresponding author; Fax: 86-816-2419011; Tel.: 86-816-2419011  
Email: [pengrufang@swust.edu.cn](mailto:pengrufang@swust.edu.cn) [yhe2014@126.com](mailto:yhe2014@126.com)

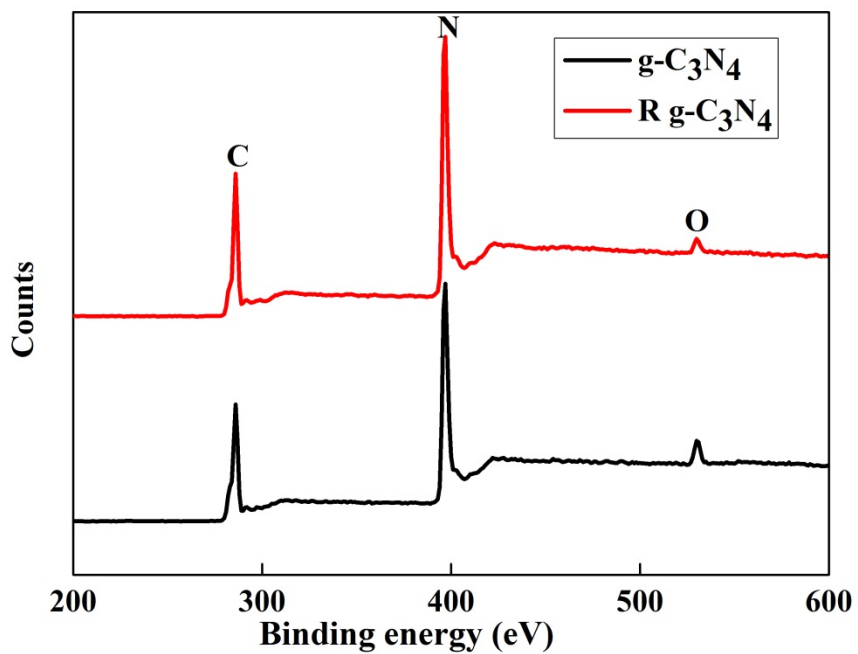

**Figure S1.** X-ray photoelectron spectroscopy of g-C<sub>3</sub>N<sub>4</sub> sample and residual g-C<sub>3</sub>N<sub>4</sub>.

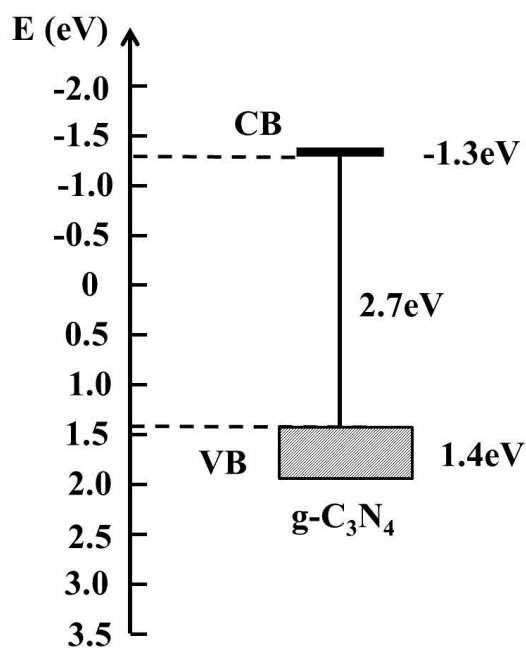

**Figure S2.** Electronic band structure of g-C<sub>3</sub>N<sub>4</sub>.

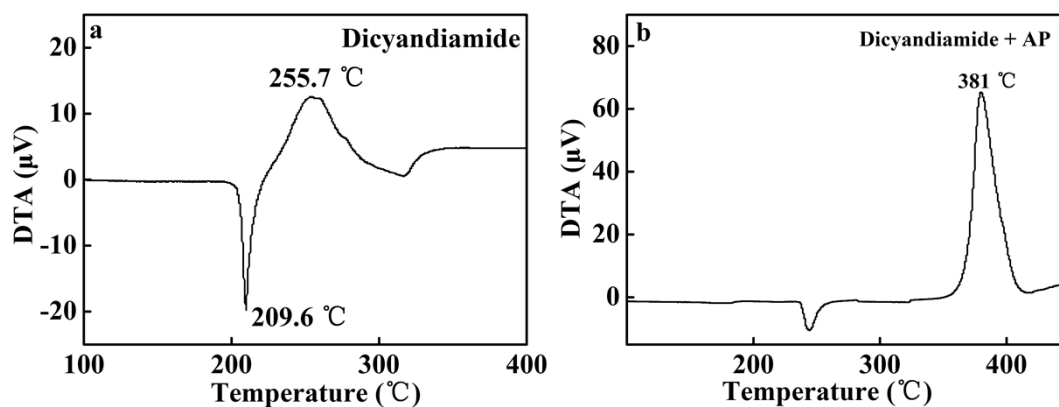

**Figure S3.** DTA curves of pure dicyandiamide (a), and AP mixed with 10 wt% dicyandiamide (b) at a heating rating of 10 °C·min<sup>-1</sup>.

As shown in Figure S3, the decomposition temperature of dicyandiamide (DCDA) at about 255.7 °C, demonstrated that DCDA has no effect on ammonium perchlorate (AP). Compared with the AP with 10 wt% DCDA (Figure S3b), the decomposition

temperature of AP at 381 °C, (g-C<sub>3</sub>N<sub>4</sub> was produced by the decomposition of DCDA at 381 °C), which is similar to previous report (Figure 2). Above results confirmed that g-C<sub>3</sub>N<sub>4</sub> is unique among metal free substance in promoting AP decomposition in background studies.

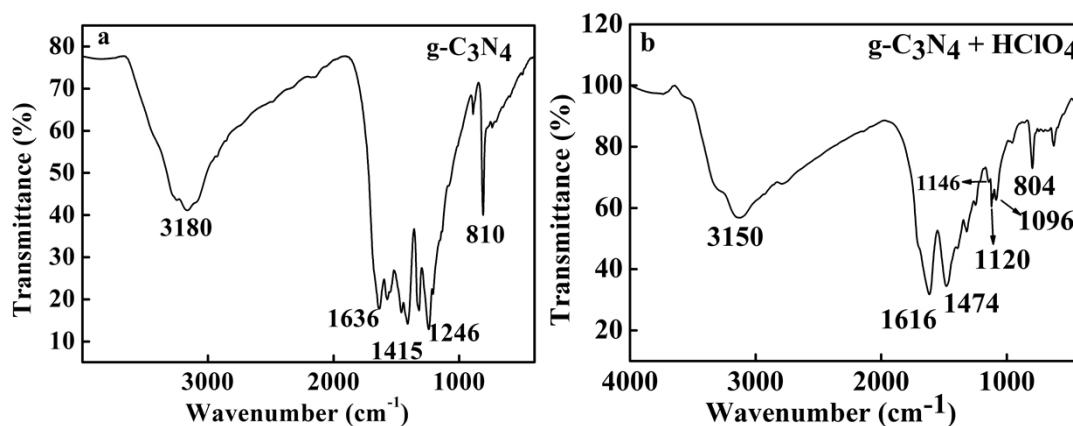

**Figure S4.** FT-IR spectra of crude g-C<sub>3</sub>N<sub>4</sub> (a) and treated g-C<sub>3</sub>N<sub>4</sub> with HClO<sub>4</sub> (b).

In order to demonstrate the acid base reaction is involved in the mechanism, g-C<sub>3</sub>N<sub>4</sub> was mixed with HClO<sub>4</sub> and incubated for 5 min, followed by centrifugation and air-drying. The treated g-C<sub>3</sub>N<sub>4</sub> was further investigated by FT-IR. As shown in Figure S4, there was an obvious change of the FT-IR spectra of crude g-C<sub>3</sub>N<sub>4</sub> and treated g-C<sub>3</sub>N<sub>4</sub>. The peaks at 1146, 1120 and 1096 cm<sup>-1</sup> are the characteristic peaks of ClO<sub>4</sub><sup>-</sup>. Therefore, we confirmed that acid base reaction is involved in the catalytic mechanism.
